# Supplementary material
Source: publisher site journal article supplement (https://www.spandidos-publications.com/1691/downloadSupplementary)

Figure S1. Effect of SLRP downregulation on the expression of  $\beta$ -catenin at the protein level. HTB94 cells were transfected for 48 h with specific siRNAs against lumican, decorin and biglycan. A non-specific RNA sequence was used as control (siScr). (A)  $\beta$ -catenin protein levels in HTB94 cells were determined by western blot analysis. The position of the nearest respective protein marker band is depicted to the right. (B)  $\beta$ -catenin (100 kDa) protein bands were densitometrically analyzed and adjusted against actin (42 kDa). Representative plots are presented. Results represent the average of three separate experiments. Data are the means  $\pm$  SEM; NS, not significant.

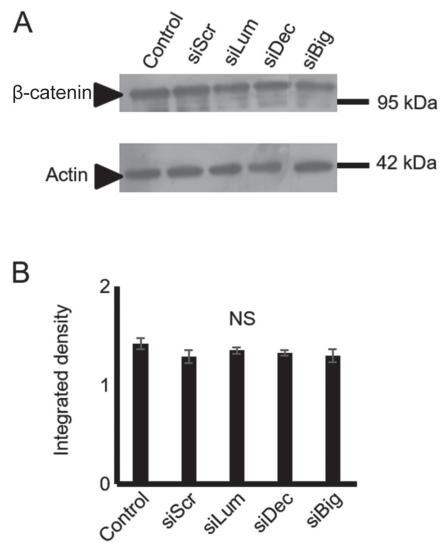

Supplement: Supplementary file 1 [file downloadSupplementary]
